# Supplementary material for: Extension of the crRNA enhances Cpf1 gene editing in vitro and in vivo
Source: PubMed Central journal article supplement (PMC6098076; doi:10.1038/s41467-018-05641-3), 2018-08-17
Supplement: 41467_2018_5641_MOESM3_ESM.pdf [file 41467_2018_5641_MOESM3_ESM.pdf]

## Description of Additional Supplementary Files

File Name: Supplementary Data 1

Description: Sequence information of nucleic acids.
